# Supplementary material
Source: MDPI journal article supplement (https://www.mdpi.com/1424-2818/13/7/311)
Supplement: s1 [file s1]

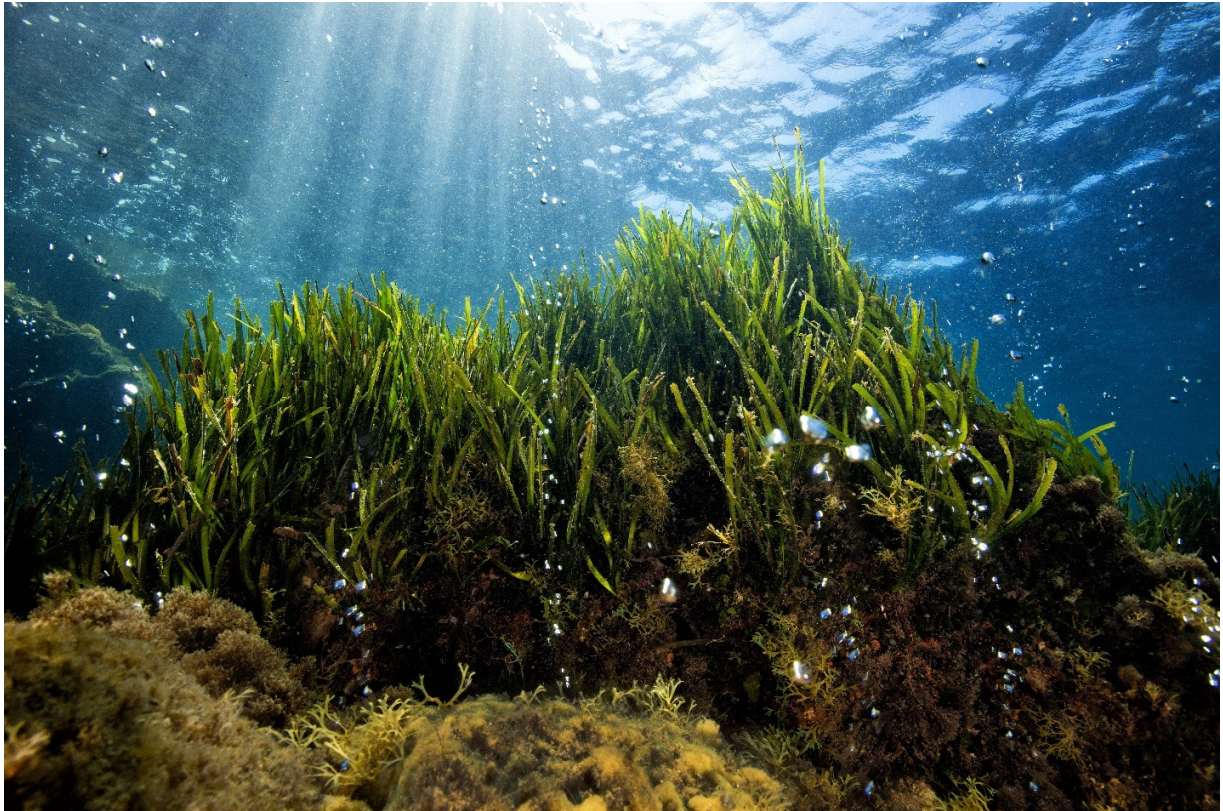

**Figure S1.** *Posidonia oceanica* meadow at extremely low pH (S3) station on THE South Castello vent site. (Photo: P. Vassallo).

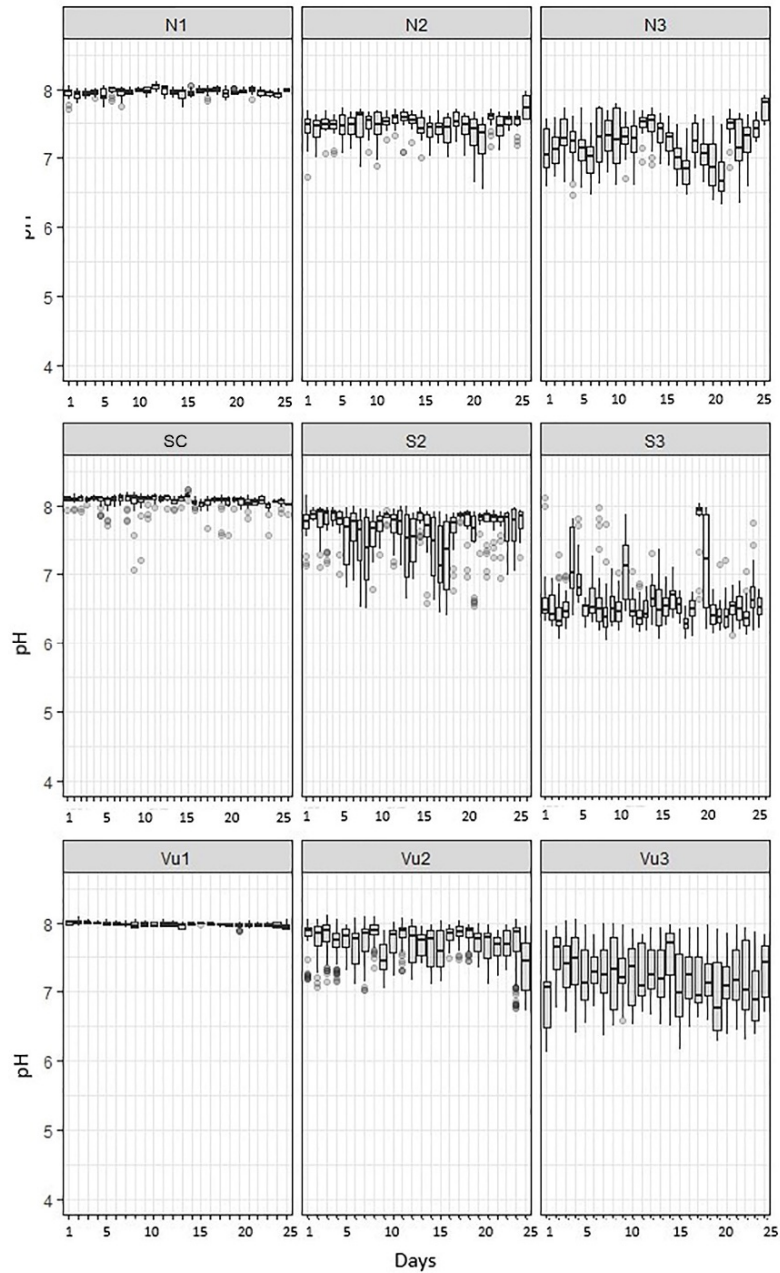

**Figure S2.** pH trend (from SeaFET pH-meter in situ) at North (N) and South (S) of Castello Aragonese, and Vullatura (Vu) measured in situ through hourly acquisition for more than twenty-three days (data kindly provided by Juhyong Lee during the experimental phase of his pH thesis (Stanford University, USA) [59]. Data are indicative of the general trend and temporal variability among sites, while actual single values may be considered with caution due to calibration problems and corrections still in progress.

**Table S1.** Mean  $\pm$  SD leaves length values and significant levels of pairwise *t*-test comparison among pH conditions and months (\*\* = *p*-value < 0.001; \* = *p*-value = 0.01; *p*-value >0.05).

|                                  | Among pH conditions comparisons  |                                   |                                  | Among months comparison          |
|----------------------------------|----------------------------------|-----------------------------------|----------------------------------|----------------------------------|
|                                  | Extremely low/Ambient pHs        | Extremely low/Low pHs             | Low/Ambient pHs                  | April / May                      |
| <i>t</i> -test, <i>p</i> -value  | ***                              |                                   | ***                              | *                                |
| Mean leaves length (cm) $\pm$ SD | 38.2 $\pm$ 14.0 / 51.0 $\pm$ 6.8 | 38.2 $\pm$ 14.0 / 41.9 $\pm$ 15.0 | 41.9 $\pm$ 15.0 / 51.0 $\pm$ 6.8 | 41.7 $\pm$ 16.1 / 45.7 $\pm$ 9.4 |

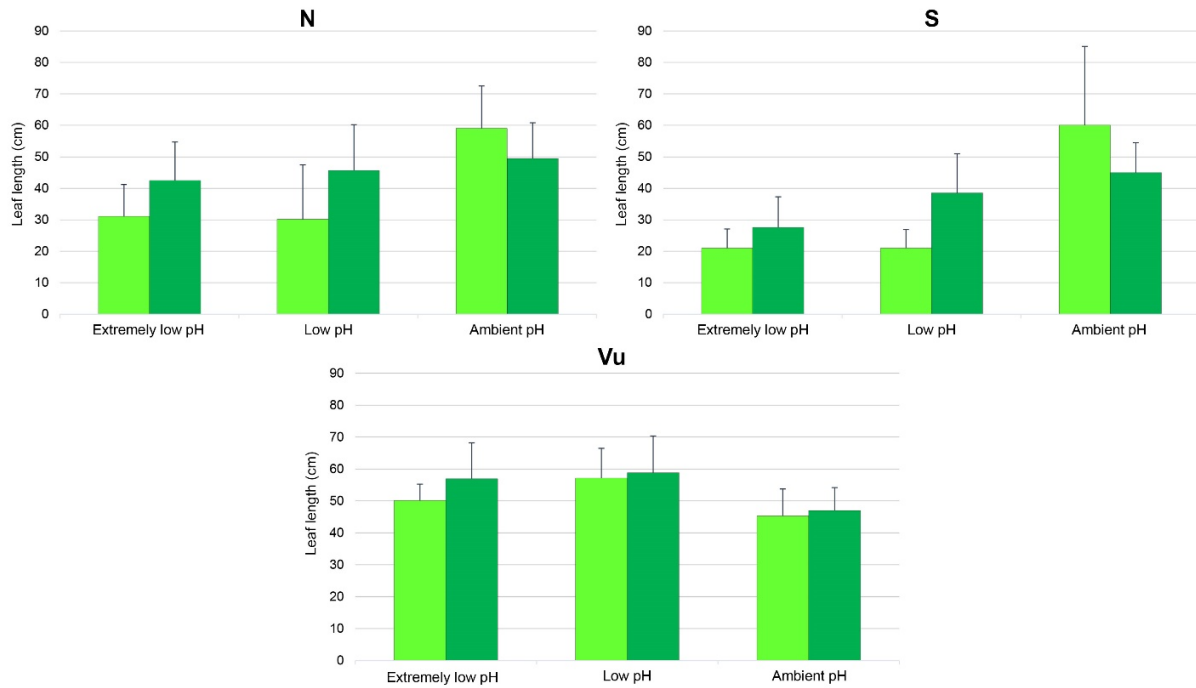

**Figure S3.** Mean leaf length of *P. oceanica* measured in the months of April 2019 (light green) and May 2019 (dark green) along the pH gradient at Castello Aragonese North (N) and South (S) sides vents, and Vullatura vent (Vu).

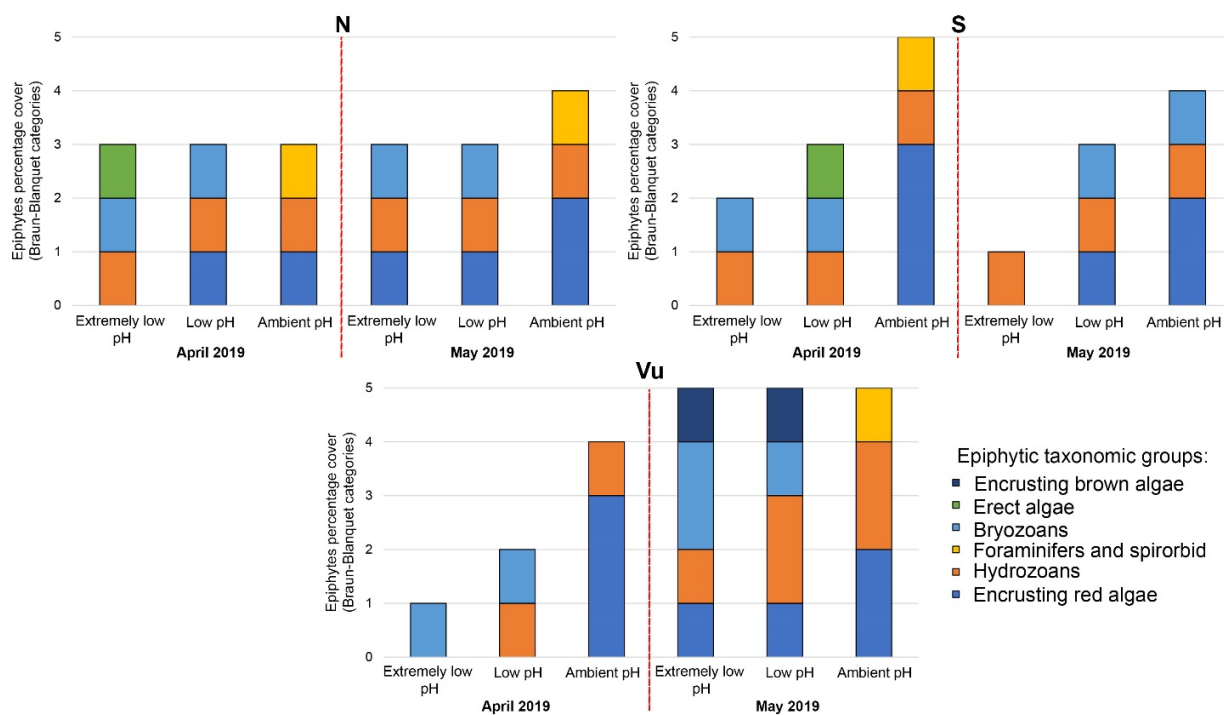

**Figure S4.** Percentage coverage (expressed as Braun-Blanquet categories) of taxonomic groups composing the epiphytic assemblages of *P. oceanica* leaves, in the months of April 2019 and May 2019, respectively, along the pH gradient at Castello Aragonese North and South (N and S) sides vents, and Vullatura (Vu) vent.

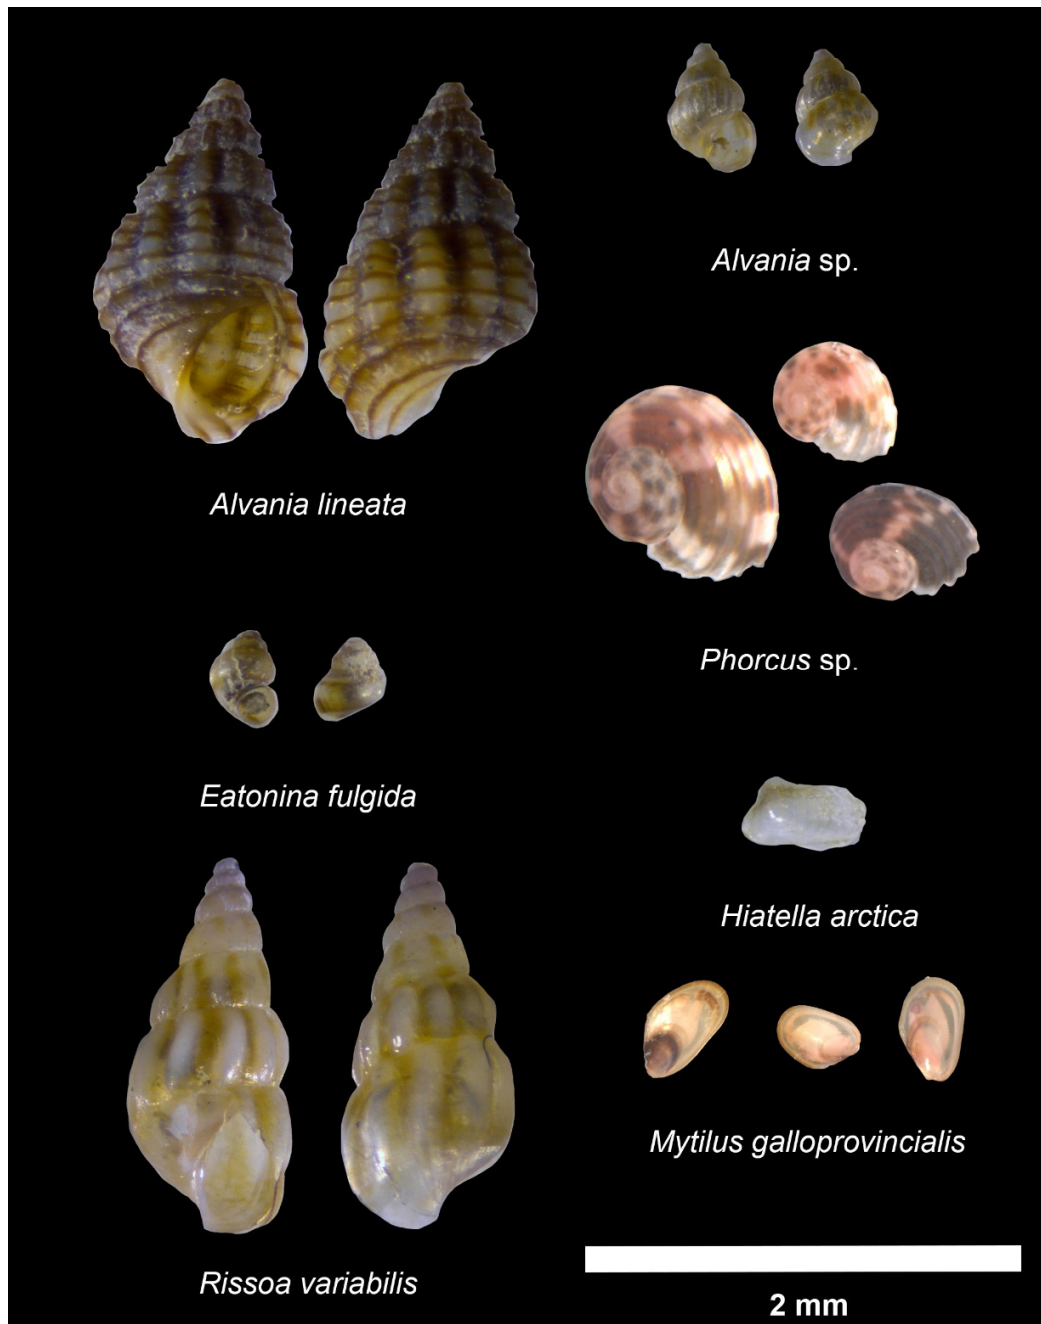

**Figure S5.** Common taxa found in the artificial collectors.



**Table S2.** Results of the SIMPER analyses showing dominant species mostly responsible for the dissimilarity among pH conditions at the investigated vent sites.

| <b>Vullatura</b>                                                              |                |                 |              |            |            |              |
|-------------------------------------------------------------------------------|----------------|-----------------|--------------|------------|------------|--------------|
| <b>Extremely low pH/Ambient pH (82.72 % average percent of dissimilarity)</b> |                |                 |              |            |            |              |
|                                                                               | <b>Average</b> | <b>Std.Dev.</b> | <b>Ratio</b> | <b>ava</b> | <b>avb</b> | <b>Cum.%</b> |
| <i>Alvania lineata</i>                                                        | 0.194          | 0.152           | 1.274        | 9.500      | 6.875      | 23.51        |
| <i>Mytilus galloprovincialis</i> juv.                                         | 0.051          | 0.066           | 0.763        | 0.375      | 3.375      | 29.68        |
| <i>Hiatella arctica</i>                                                       | 0.047          | 0.051           | 0.915        | 1.250      | 2.125      | 35.37        |
| <i>Venerupis</i> sp.                                                          | 0.043          | 0.068           | 0.632        | 1.625      | 0.625      | 40.62        |
| <i>Acanthocardia echinata</i> juv.                                            | 0.040          | 0.036           | 1.116        | 1.250      | 1.625      | 45.53        |
| <i>Pusillina marginata</i>                                                    | 0.040          | 0.044           | 0.907        | 1.625      | 0.500      | 50.38        |
| <i>Rissoa variabilis</i>                                                      | 0.038          | 0.056           | 0.681        | 2.875      | 0.500      | 55.02        |
| <i>Melanella petitiiana</i>                                                   | 0.038          | 0.055           | 0.693        | 2.000      | 0.125      | 59.64        |
| <b>Extremely low pH/Low pH (88.38% average percent of dissimilarity)</b>      |                |                 |              |            |            |              |
|                                                                               | <b>Average</b> | <b>Std.Dev.</b> | <b>Ratio</b> | <b>ava</b> | <b>avb</b> | <b>Cum.%</b> |
| <i>Alvania lineata</i>                                                        | 0.172          | 0.200           | 0.860        | 9.500      | 1.000      | 19.53        |
| <i>Ecrobia ventrosa</i>                                                       | 0.093          | 0.112           | 0.832        | 1.375      | 2.500      | 30.15        |
| <i>Rissoa variabilis</i>                                                      | 0.086          | 0.076           | 1.127        | 2.875      | 2.125      | 39.89        |
| <i>Venerupis</i> sp.                                                          | 0.073          | 0.134           | 0.546        | 1.625      | 0.000      | 48.23        |
| <i>Pusillina marginata</i>                                                    | 0.063          | 0.072           | 0.875        | 1.625      | 0.625      | 55.45        |
| <i>Melanella petitiiana</i>                                                   | 0.061          | 0.078           | 0.778        | 2.000      | 0.375      | 62.36        |
| <b>Low pH/Ambient pH (87.91% average percent of dissimilarity)</b>            |                |                 |              |            |            |              |
|                                                                               | <b>Average</b> | <b>Std.Dev.</b> | <b>Ratio</b> | <b>ava</b> | <b>avb</b> | <b>Cum.%</b> |
| <i>Alvania lineata</i>                                                        | 0.168          | 0.161           | 1.044        | 1.000      | 6.875      | 19.2         |
| <i>Hiatella arctica</i>                                                       | 0.061          | 0.077           | 0.790        | 0.000      | 2.125      | 26.21        |
| <i>Mytilus galloprovincialis</i> juv.                                         | 0.061          | 0.082           | 0.747        | 0.000      | 3.375      | 33.2         |
| <i>Ecrobia ventrosa</i>                                                       | 0.059          | 0.074           | 0.805        | 2.500      | 0.375      | 40           |
| <i>Rissoa variabilis</i>                                                      | 0.051          | 0.059           | 0.862        | 2.125      | 0.500      | 45.84        |
| <i>Acanthocardia echinata</i> juv.                                            | 0.040          | 0.029           | 1.354        | 0.000      | 0.500      | 45.84        |
| <i>Musculus subpictus</i>                                                     | 0.039          | 0.032           | 1.207        | 0.375      | 1.875      | 54.99        |
| <i>Lima</i> sp.                                                               | 0.037          | 0.037           | 0.983        | 0.125      | 1.750      | 59.23        |
| <b>Castello North site</b>                                                    |                |                 |              |            |            |              |
| <b>Extremely low pH/Ambient pH (74.71% average percent of dissimilarity)</b>  |                |                 |              |            |            |              |
|                                                                               | <b>Average</b> | <b>Std.Dev.</b> | <b>Ratio</b> | <b>ava</b> | <b>avb</b> | <b>Cum.%</b> |
| <i>Alvania</i> sp. juv.                                                       | 0.106          | 0.119           | 0.890        | 11.375     | 0.250      | 14.17        |
| <i>Ecrobia ventrosa</i>                                                       | 0.077          | 0.071           | 1.094        | 1.000      | 8.375      | 24.5         |
| <i>Mytilus galloprovincialis</i> juv.                                         | 0.074          | 0.056           | 1.309        | 2.875      | 8.000      | 34.36        |
| <i>Rissoa variabilis</i>                                                      | 0.062          | 0.047           | 1.298        | 6.000      | 4.500      | 42.59        |
| <i>Eatonina fulgida</i>                                                       | 0.050          | 0.032           | 1.564        | 5.125      | 0.875      | 49.29        |
| <i>Musculus subpictus</i>                                                     | 0.034          | 0.019           | 1.756        | 0.500      | 3.500      | 53.79        |
| <i>Alvania lineata</i>                                                        | 0.031          | 0.026           | 1.202        | 2.250      | 2.375      | 57.98        |
| <i>Melanella petitiiana</i>                                                   | 0.026          | 0.031           | 0.855        | 0.000      | 2.375      | 61.48        |
| <b>Extremely low pH/Low pH (70.99% average percent of dissimilarity)</b>      |                |                 |              |            |            |              |
|                                                                               | <b>Average</b> | <b>Std.Dev.</b> | <b>Ratio</b> | <b>ava</b> | <b>avb</b> | <b>Cum.%</b> |
| <i>Alvania</i> sp. juv                                                        | 0.138          | 0.131           | 1.052        | 11.375     | 3.125      | 19.45        |
| <i>Rissoa variabilis</i>                                                      | 0.084          | 0.072           | 1.160        | 6.000      | 2.625      | 31.27        |
| <i>Eatonina fulgida</i>                                                       | 0.059          | 0.043           | 1.379        | 5.125      | 2.500      | 39.6         |
| <i>Alvania lineata</i>                                                        | 0.052          | 0.062           | 0.834        | 2.250      | 2.875      | 46.89        |

| <i>Hiatella arctica</i>                                               | 0.045   | 0.047    | 0.948 | 0.875  | 3.625  | 53.19 |
|-----------------------------------------------------------------------|---------|----------|-------|--------|--------|-------|
| <i>Mytilus galloprovincialis</i> juv.                                 | 0.042   | 0.045    | 0.938 | 2.875  | 1.875  | 59.15 |
| Low pH/Ambient pH (73.60% average percent of dissimilarity)           |         |          |       |        |        |       |
|                                                                       | Average | Std.Dev. | Ratio | ava    | avb    | Cum.% |
| <i>Ecrobia ventrosa</i>                                               | 0.086   | 0.083    | 1.025 | 1.375  | 8.375  | 11.62 |
| <i>Mytilus galloprovincialis</i> juv.                                 | 0.082   | 0.064    | 1.299 | 1.875  | 8.000  | 22.82 |
| <i>Rissoa variabilis</i>                                              | 0.054   | 0.046    | 1.178 | 2.625  | 4.500  | 30.18 |
| <i>Hiatella arctica</i>                                               | 0.048   | 0.051    | 0.929 | 3.625  | 2.000  | 36.63 |
| <i>Alvania lineata</i>                                                | 0.040   | 0.043    | 0.931 | 2.875  | 2.375  | 42.13 |
| <i>Alvania</i> sp. juv                                                | 0.037   | 0.043    | 0.875 | 3.125  | 0.250  | 47.23 |
| <i>Musculus subpictus</i>                                             | 0.034   | 0.022    | 1.528 | 1.125  | 3.500  | 51.85 |
| <i>Nodulus contortus</i>                                              | 0.034   | 0.051    | 0.667 | 0.875  | 2.625  | 56.44 |
| <i>Melanella petitiiana</i>                                           | 0.029   | 0.033    | 0.871 | 0.125  | 2.375  | 60.39 |
| Castello South site                                                   |         |          |       |        |        |       |
| Extremely low pH/Ambient pH (57.08% average percent of dissimilarity) |         |          |       |        |        |       |
|                                                                       | Average | Std.Dev. | Ratio | ava    | avb    | Cum.% |
| <i>Mytilus galloprovincialis</i> juv.                                 | 0.202   | 0.182    | 1.107 | 88.143 | 40.875 | 35.32 |
| <i>Phorcus</i> sp. juv.                                               | 0.057   | 0.057    | 1.007 | 3.714  | 18.250 | 45.35 |
| <i>Venerupis</i> sp.                                                  | 0.032   | 0.026    | 1.270 | 7.143  | 10.000 | 51.03 |
| <i>Rissoa variabilis</i>                                              | 0.025   | 0.024    | 1.055 | 3.429  | 5.125  | 55.50 |
| <i>Hiatella arctica</i>                                               | 0.025   | 0.028    | 0.896 | 4.286  | 6.250  | 59.91 |
| Extremely low pH/Low pH (51.36% average percent of dissimilarity)     |         |          |       |        |        |       |
|                                                                       | Average | Std.Dev. | Ratio | ava    | avb    | Cum.% |
| <i>Mytilus galloprovincialis</i> juv.                                 | 0.215   | 0.180    | 1.194 | 88.143 | 56.625 | 41.80 |
| <i>Venerupis</i> sp.                                                  | 0.035   | 0.036    | 0.994 | 7.143  | 7.375  | 48.68 |
| <i>Alvania lineata</i>                                                | 0.035   | 0.036    | 0.968 | 4.000  | 7.750  | 55.49 |
| <i>Phorcus</i> sp. juv.                                               | 0.033   | 0.021    | 1.586 | 3.714  | 10.750 | 61.83 |
| Low pH/Ambient pH (57.08% average percent of dissimilarity)           |         |          |       |        |        |       |
|                                                                       | Average | Std.Dev. | Ratio | ava    | avb    | Cum.% |
| <i>Mytilus galloprovincialis</i> juv.                                 | 0.12    | 0.09     | 1.38  | 56.63  | 40.88  | 24.95 |
| <i>Phorcus</i> sp. juv.                                               | 0.06    | 0.04     | 1.26  | 10.75  | 18.25  | 36.25 |
| <i>Alvania lineata</i>                                                | 0.03    | 0.04     | 0.86  | 7.75   | 2.63   | 42.58 |
| <i>Rissoa variabilis</i>                                              | 0.03    | 0.02     | 1.32  | 6.00   | 5.13   | 47.98 |
| <i>Venerupis</i> sp.                                                  | 0.03    | 0.02     | 1.28  | 7.38   | 10.00  | 53.00 |
| <i>Jujubinus gravinae</i>                                             | 0.02    | 0.01     | 1.39  | 2.75   | 5.25   | 57.10 |
| <i>Hiatella arctica</i>                                               | 0.02    | 0.03     | 0.70  | 2.25   | 6.25   | 61.13 |



**Table S3.** Results of the SIMPER analyses showing species mostly responsible for the dissimilarity among pH conditions in the three investigated microhabitats at the Vullatura vent site.

| Canopy (C)                                                            |         |          |       |       |        |       |
|-----------------------------------------------------------------------|---------|----------|-------|-------|--------|-------|
| Extremely low pH/Ambient pH (81.14% average percent of dissimilarity) |         |          |       |       |        |       |
|                                                                       | Average | Std.Dev. | Ratio | ava   | avb    | Cum.% |
| <i>Alvania lineata</i>                                                | 0.151   | 0.132    | 1.150 | 8.417 | 6.583  | 18.65 |
| <i>Nodulus contortus</i>                                              | 0.058   | 0.117    | 0.495 | 0.000 | 3.917  | 25.78 |
| <i>Mytilus galloprovincialis</i> juv.                                 | 0.050   | 0.071    | 0.704 | 0.250 | 3.167  | 31.92 |
| <i>Hiatella arctica</i>                                               | 0.047   | 0.055    | 0.859 | 0.833 | 2.250  | 37.77 |
| <i>Rissoa variabilis</i>                                              | 0.047   | 0.059    | 0.793 | 3.000 | 0.333  | 43.54 |
| <i>Acanthocardia echinata</i>                                         | 0.034   | 0.031    | 1.087 | 0.917 | 1.500  | 0.477 |
| <i>Venerupis</i> sp.                                                  | 0.033   | 0.057    | 0.575 | 1.083 | 0.750  | 51.71 |
| <i>Melanella petitiana</i>                                            | 0.030   | 0.048    | 0.635 | 1.583 | 0.083  | 55.45 |
| <i>Pusillina marginata</i>                                            | 0.030   | 0.040    | 0.756 | 1.083 | 0.667  | 59.14 |
| Extremely low pH/Low pH (88.10% average percent of dissimilarity)     |         |          |       |       |        |       |
|                                                                       | Average | Std.Dev. | Ratio | ava   | avb    | Cum.% |
| <i>Alvania lineata</i>                                                | 0.199   | 0.190    | 1.045 | 8.417 | 0.750  | 22.57 |
| <i>Rissoa variabilis</i>                                              | 0.094   | 0.088    | 1.073 | 3.000 | 1.500  | 33.24 |
| <i>Ecrobia ventrosa</i>                                               | 0.074   | 0.108    | 0.692 | 1.750 | 0.917  | 41.66 |
| <i>Melanella petitiana</i>                                            | 0.054   | 0.078    | 0.702 | 1.583 | 0.250  | 47.88 |
| <i>Venerupis</i> sp.                                                  | 0.053   | 0.127    | 0.417 | 1.083 | 0.000  | 53.89 |
| <i>Pusillina marginata</i>                                            | 0.050   | 0.070    | 0.721 | 1.083 | 0.500  | 59.58 |
| Low pH/Ambient pH (91.39% average percent of dissimilarity)           |         |          |       |       |        |       |
|                                                                       | Average | Std.Dev. | Ratio | ava   | avb    | Cum.% |
| <i>Alvania lineata</i>                                                | 0.17    | 0.16     | 1.08  | 0.75  | 6.58   | 18.56 |
| <i>Nodulus contortus</i>                                              | 0.07    | 0.14     | 0.53  | 0.17  | 3.92   | 26.45 |
| <i>Hiatella arctica</i>                                               | 0.06    | 0.08     | 0.82  | 0.33  | 2.25   | 33.38 |
| <i>Mytilus galloprovincialis</i> juv.                                 | 0.06    | 0.09     | 0.69  | 0.00  | 3.17   | 39.88 |
| <i>Ecrobia ventrosa</i>                                               | 0.04    | 0.06     | 0.65  | 1.75  | 0.25   | 44.36 |
| <i>Acanthocardia echinata</i>                                         | 0.04    | 0.03     | 1.38  | 0.00  | 1.50   | 48.57 |
| <i>Rissoa variabilis</i>                                              | 0.04    | 0.05     | 0.71  | 1.50  | 0.33   | 52.54 |
| <i>Lima</i> sp.                                                       | 0.04    | 0.04     | 0.88  | 0.08  | 1.67   | 56.38 |
| <i>Musculus subpictus</i>                                             | 0.03    | 0.03     | 0.98  | 0.25  | 1.42   | 60.01 |
| Bottom/rhizome (B)                                                    |         |          |       |       |        |       |
| Extremely low pH/Ambient pH (89.05% average percent of dissimilarity) |         |          |       |       |        |       |
|                                                                       | Average | Std.Dev. | Ratio | ava   | avb    | Cum.% |
| <i>Alvania lineata</i>                                                | 0.096   | 0.084    | 1.145 | 0.833 | 4.167  | 10.81 |
| <i>Ecrobia ventrosa</i>                                               | 0.085   | 0.108    | 0.790 | 2.833 | 0.083  | 20.38 |
| <i>Rissoa variabilis</i>                                              | 0.062   | 0.079    | 0.779 | 1.667 | 1.167  | 27.31 |
| <i>Hiatella arctica</i>                                               | 0.061   | 0.067    | 0.908 | 2.000 | 1.167  | 0.34  |
| <i>Nodulus contortus</i>                                              | 0.058   | 0.114    | 0.510 | 0.083 | 3.917  | 40.69 |
| <i>Pusillina marginata</i>                                            | 0.049   | 0.058    | 0.838 | 1.667 | 0.417  | 46.19 |
| <i>Venerupis</i> sp.                                                  | 0.048   | 0.102    | 0.467 | 1.250 | 0.333  | 51.53 |
| <i>Mytilus galloprovincialis</i> juv.                                 | 0.047   | 0.073    | 0.645 | 2.083 | 0.917  | 56.80 |
| <i>Acanthocardia echinata</i>                                         | 0.042   | 0.054    | 0.780 | 1.750 | 0.500  | 61.54 |
| Extremely low pH/Low pH (90.21% average percent of dissimilarity)     |         |          |       |       |        |       |
|                                                                       | Average | Std.Dev. | Ratio | ava   | avb    | Cum.% |
| <i>Alvania lineata</i>                                                | 0.179   | 0.158    | 1.134 | 0.833 | 10.750 | 19.80 |
| <i>Ecrobia ventrosa</i>                                               | 0.088   | 0.109    | 0.809 | 2.833 | 0.000  | 29.58 |
| <i>Rissoa variabilis</i>                                              | 0.064   | 0.079    | 0.811 | 1.667 | 2.000  | 36.72 |
| <i>Hiatella arctica</i>                                               | 0.052   | 0.064    | 0.812 | 2.000 | 0.250  | 42.48 |
| <i>Pusillina marginata</i>                                            | 0.049   | 0.058    | 0.839 | 1.667 | 0.167  | 47.88 |
| <i>Venerupis</i> sp.                                                  | 0.046   | 0.099    | 0.469 | 1.250 | 0.250  | 53.03 |

|                                                                       |                |                 |              |            |            |              |
|-----------------------------------------------------------------------|----------------|-----------------|--------------|------------|------------|--------------|
| <i>Acanthocardia echinata</i>                                         | 0.043          | 0.055           | 0.781        | 1.750      | 0.167      | 57.80        |
| <i>Mytilus galloprovincialis</i> juv.                                 | 0.039          | 0.065           | 0.603        | 2.083      | 0.417      | 62.16        |
| Low pH/Ambient pH (83.02% average percent of dissimilarity)           |                |                 |              |            |            |              |
|                                                                       | <b>Average</b> | <b>Std.Dev.</b> | <b>Ratio</b> | <b>ava</b> | <b>avb</b> | <b>Cum.%</b> |
| <i>Alvania lineata</i>                                                | 0.215          | 0.169           | 1.269        | 10.750     | 4.167      | 25.91        |
| <i>Nodulus contortus</i>                                              | 0.064          | 0.123           | 0.520        | 0.083      | 3.917      | 33.59        |
| <i>Rissoa variabilis</i>                                              | 0.062          | 0.078           | 0.788        | 2.000      | 1.167      | 41.02        |
| <i>Melanella petitiana</i>                                            | 0.052          | 0.111           | 0.466        | 1.417      | 0.250      | 47.24        |
| <i>Vitreolina philippii</i>                                           | 0.033          | 0.069           | 0.477        | 0.417      | 0.417      | 51.21        |
| <i>Hiatella arctica</i>                                               | 0.032          | 0.052           | 0.618        | 0.250      | 1.167      | 55.07        |
| <i>Alvania pagodula</i>                                               | 0.026          | 0.057           | 0.466        | 0.167      | 1.667      | 58.25        |
| <i>Musculus subpictus</i>                                             | 0.024          | 0.042           | 0.575        | 0.667      | 0.250      | 61.18        |
| Dead Matte (M)                                                        |                |                 |              |            |            |              |
| Extremely low pH/Ambient pH (89.05% average percent of dissimilarity) |                |                 |              |            |            |              |
|                                                                       | <b>Average</b> | <b>Std.Dev.</b> | <b>Ratio</b> | <b>ava</b> | <b>avb</b> | <b>Cum.%</b> |
| <i>Alvania lineata</i>                                                | 0.096          | 0.084           | 1.145        | 0.833      | 4.167      | 10.81        |
| <i>Ecrobia ventrosa</i>                                               | 0.085          | 0.108           | 0.790        | 2.833      | 0.083      | 20.38        |
| <i>Rissoa variabilis</i>                                              | 0.062          | 0.079           | 0.779        | 1.667      | 1.167      | 27.31        |
| <i>Hiatella arctica</i>                                               | 0.061          | 0.067           | 0.908        | 2.000      | 1.167      | 34.15        |
| <i>Nodulus contortus</i>                                              | 0.058          | 0.114           | 0.510        | 0.083      | 3.917      | 40.69        |
| <i>Pusillina marginata</i>                                            | 0.049          | 0.058           | 0.838        | 1.667      | 0.417      | 46.19        |
| <i>Venerupis</i> sp.                                                  | 0.048          | 0.102           | 0.467        | 1.250      | 0.333      | 51.53        |
| <i>Mytilus galloprovincialis</i> juv.                                 | 0.047          | 0.073           | 0.645        | 2.083      | 0.917      | 56.8         |
| <i>Acanthocardia echinata</i>                                         | 0.042          | 0.054           | 0.780        | 1.750      | 0.500      | 61.54        |
| Extremely low pH/Low pH (90.21 % average percent of dissimilarity)    |                |                 |              |            |            |              |
|                                                                       | <b>Average</b> | <b>Std.Dev.</b> | <b>Ratio</b> | <b>ava</b> | <b>avb</b> | <b>Cum.%</b> |
| <i>Alvania lineata</i>                                                | 0.179          | 0.158           | 1.134        | 0.833      | 10.750     | 19.80        |
| <i>Ecrobia ventrosa</i>                                               | 0.088          | 0.109           | 0.809        | 2.833      | 0.000      | 29.58        |
| <i>Rissoa variabilis</i>                                              | 0.064          | 0.079           | 0.811        | 1.667      | 2.000      | 36.72        |
| <i>Hiatella arctica</i>                                               | 0.052          | 0.064           | 0.812        | 2.000      | 0.250      | 42.48        |
| <i>Pusillina marginata</i>                                            | 0.049          | 0.058           | 0.839        | 1.667      | 0.167      | 47.88        |
| <i>Venerupis</i> sp.                                                  | 0.046          | 0.099           | 0.469        | 1.250      | 0.250      | 53.03        |
| <i>Acanthocardia echinata</i>                                         | 0.043          | 0.055           | 0.781        | 1.750      | 0.167      | 57.80        |
| <i>Mytilus galloprovincialis</i> juv.                                 | 0.039          | 0.065           | 0.603        | 2.083      | 0.417      | 62.16        |
| Low pH/Ambient pH (83.02 % average percent of dissimilarity)          |                |                 |              |            |            |              |
|                                                                       | <b>Average</b> | <b>Std.Dev.</b> | <b>Ratio</b> | <b>ava</b> | <b>avb</b> | <b>Cum.%</b> |
| <i>Alvania lineata</i>                                                | 0.215          | 0.169           | 1.269        | 10.750     | 4.167      | 25.91        |
| <i>Nodulus contortus</i>                                              | 0.064          | 0.123           | 0.520        | 0.083      | 3.917      | 33.59        |
| <i>Rissoa variabilis</i>                                              | 0.062          | 0.078           | 0.788        | 2.000      | 1.167      | 41.02        |
| <i>Melanella petitiana</i>                                            | 0.052          | 0.111           | 0.466        | 1.417      | 0.250      | 47.24        |
| <i>Vitreolina philippii</i>                                           | 0.033          | 0.069           | 0.477        | 0.417      | 0.417      | 51.21        |
| <i>Hiatella arctica</i>                                               | 0.032          | 0.052           | 0.618        | 0.250      | 1.167      | 55.07        |
| <i>Alvania pagodula</i>                                               | 0.026          | 0.057           | 0.466        | 0.167      | 1.667      | 58.25        |
| <i>Musculus subpictus</i>                                             | 0.024          | 0.042           | 0.575        | 0.667      | 0.250      | 61.18        |

**Table S4.** Comparison among post-settlement molluscs described in the present study and the checklist of the mollusc taxa recorded in the CO<sub>2</sub> vent sites of the Castello Aragonese (data gathered in Foo et al. [15], Garrard [69], and Garrard et al. [54]. Low and extremely low stations have been unified to homogenize data from different studies. The “X” indicates the presence of a given taxa.

|                                                   | Present study            |                    | Foo et al. 2018          |                    | Garrard 2013; Garrard et al. 2014 |                    |
|---------------------------------------------------|--------------------------|--------------------|--------------------------|--------------------|-----------------------------------|--------------------|
|                                                   | Control/Ambient stations | Acidified stations | Control/Ambient stations | Acidified stations | Control/Ambient stations          | Acidified stations |
| <b>Bivalvia</b>                                   |                          |                    |                          |                    |                                   |                    |
| <i>Abra alba</i> (W. Wood, 1802)                  |                          | X                  | X                        | X                  | X                                 | X                  |
| <i>Acanthocardia echinata</i> (Linnaeus, 1758)    | X                        | X                  |                          |                    |                                   |                    |
| <i>Acanthocardia tuberculata</i> (Linnaeus, 1758) |                          |                    |                          |                    | X                                 | X                  |
| <i>Anomia ephippium</i> (Linnaeus, 1758)          | X                        | X                  | X                        | X                  |                                   |                    |
| <i>Arca noae</i> (Linnaeus, 1758)                 | X                        | X                  | X                        | X                  | X                                 | X                  |
| <i>Arcuatula perfragilis</i> (Dunker, 1857)       |                          |                    |                          |                    | X                                 |                    |
| <i>Barbatia barbata</i> (Linnaeus, 1758)          |                          |                    |                          |                    |                                   | X                  |
| <i>Chama gryphoides</i> Linnaeus, 1758            |                          |                    | X                        |                    |                                   | X                  |
| <i>Donax semistriatus</i> Poli, 1795              |                          |                    |                          |                    | X                                 |                    |
| <i>Glans trapezia</i> (Linnaeus, 1767)            |                          |                    | X                        | X                  | X                                 | X                  |
| <i>Gregariella semigranata</i> (Reeve, 1858)      | X                        | X                  |                          |                    |                                   |                    |
| <i>Haminoea</i> sp.                               |                          | X                  |                          |                    |                                   |                    |
| <i>Hiatella arctica</i> (Linnaeus, 1767)          | X                        | X                  |                          |                    | X                                 |                    |
| <i>Hiatella rugosa</i> (Linnaeus, 1767)           |                          |                    | X                        |                    | X                                 |                    |
| <i>Irus irus</i> (Linnaeus, 1758)                 |                          |                    |                          |                    | X                                 |                    |
| <i>Lima</i> sp.                                   | X                        | X                  | X                        |                    |                                   | X                  |
| <i>Limaria tuberculata</i> (Olivi, 1792)          |                          |                    |                          |                    | X                                 | X                  |

|                                                      |   |   |   |   |  |   |   |
|------------------------------------------------------|---|---|---|---|--|---|---|
| <i>Lutraria oblonga</i><br>(Gmelin, 1791)            |   |   |   |   |  |   | X |
| <i>Macomangulus tenuis</i> (da Costa, 1778)          |   |   |   |   |  |   | X |
| <i>Macomopsis cumana</i> (O.G. Costa, 1830)          |   |   |   |   |  | X |   |
| <i>Mimachlamys varia</i> (Linneo, 1758)              | X | X |   | X |  | X |   |
| <i>Modiolus barbatus</i><br>(Linnaeus, 1758)         |   |   |   |   |  |   | X |
| <i>Moerella donacina</i><br>(Linnaeus, 1758)         |   |   |   |   |  | X |   |
| <i>Musculus subpictus</i><br>(Cantraine, 1835)       | X | X | X | X |  | X | X |
| <i>Mytilus galloprovincialis</i> juv.(Lamarck, 1819) | X | X | X | X |  | X |   |
| <i>Ostrea</i> sp.                                    |   |   | X |   |  |   |   |
| <i>Parvicardium</i> sp.<br>(Monterosato, 1884)       | X | X | X |   |  | X |   |
| <i>Pecten</i> sp.                                    | X | X |   |   |  |   |   |
| <i>Rocellaria dubia</i><br>(Pennant, 1777)           |   |   | X |   |  |   |   |
| <i>Striarca lactea</i><br>(Linnaeus, 1758)           |   |   |   |   |  | X | X |
| <i>Timoclea ovata</i><br>(Pennant, 1777)             |   |   |   |   |  |   | X |
| <i>Venerupis</i> sp.                                 | X | X |   |   |  | X |   |
| Veneridae gen. sp.                                   | X | X |   |   |  | X | X |

---

**Gastropoda**

---

|                                                                   |   |   |   |   |  |   |   |
|-------------------------------------------------------------------|---|---|---|---|--|---|---|
| <i>Alvania cimex</i><br>(Linneo, 1758)                            | X | X | X |   |  | X | X |
| <i>Alvania discors</i> ( T.Brown , 1818)                          | X | X |   |   |  |   |   |
| <i>Alvania geryonia</i><br>(Nardo, 1847)                          |   |   |   | X |  |   |   |
| <i>Alvania lineata</i><br>(Risso, 1826)                           | X | X | X | X |  | X | X |
| <i>Alvania mamillata</i><br>Risso, 1826                           |   |   |   | X |  |   |   |
| <i>Alvania pagodula</i><br>(Bucquoy, Dautzenberg & Dollfus, 1884) | X |   |   |   |  |   |   |

|                                                                    |   |   |   |  |   |   |   |
|--------------------------------------------------------------------|---|---|---|--|---|---|---|
| <i>Alvania piersmai</i><br>(Moolenbeek & Hoenselaar, 1989)         | X | X |   |  |   |   |   |
| <i>Alvania scabra</i><br>(Filippi, 1844)                           | X | X |   |  |   |   |   |
| <i>Alvania</i> sp. juv.                                            | X | X | X |  | X |   |   |
| <i>Alvania subareolata</i> (Monterosato, 1869)                     |   | X |   |  |   |   |   |
| <i>Alvania subcrenulata</i> (Bucquoy, Dautzenberg & Dollfus, 1884) |   |   | X |  |   |   |   |
| <i>Ammonicera fischeriana</i><br>(Monterosato, 1869)               | X | X |   |  |   |   |   |
| <i>Aplysia depilans</i><br>Gmelin, 1791                            |   |   | X |  | X |   |   |
| <i>Bittium latreillii</i><br>(Payraudeau, 1826)                    | X | X | X |  | X | X | X |
| <i>Bittium reticulatum</i> (Da Costa, 1778)                        |   |   | X |  | X |   |   |
| <i>Bittium</i> sp.                                                 |   |   | X |  | X |   |   |
| <i>Bolma rugosa</i><br>(Linneo, 1767)                              |   | X | X |  |   |   |   |
| <i>Bulla striata</i><br>Bruguière, 1792                            |   |   |   |  | X |   |   |
| <i>Calliostoma laugierii</i><br>(Payraudeau, 1826)                 |   |   | X |  |   | X | X |
| <i>Calliostoma</i> sp.                                             |   |   | X |  | X |   |   |
| <i>Cerithiopsis diadema</i><br>Monterosato, 1874                   |   |   |   |  |   | X |   |
| <i>Cerithiopsis micalii</i> (Cecalupo & Villari, 1997)             |   |   |   |  |   | X | X |
| <i>Cerithium scabridum</i><br>Philippi, 1848                       |   |   |   |  |   | X |   |
| <i>Cerithium</i> sp.                                               |   | X |   |  |   |   |   |
| <i>Cerithium vulgatum</i><br>(Bruguière, 1792)                     | X | X | X |  | X |   |   |
| <i>Chauvetia brunnea</i><br>(Donovan, 1804)                        |   |   |   |  |   | X | X |
| <i>Chrysallida indistincta</i><br>(Brazier, 1894)                  |   |   |   |  |   | X |   |
| <i>Clanculus cruciatus</i><br>(Linnaeus, 1758)                     |   |   |   |  |   | X | X |

|                                                   |   |  |   |   |   |   |   |
|---------------------------------------------------|---|--|---|---|---|---|---|
| <i>Clanculus jussieui</i><br>(Payraudeau, 1826)   |   |  |   | X |   |   |   |
| <i>Columbella rustica</i> (Linnaeus, 1758)        |   |  | X | X |   | X | X |
| <i>Conus ventricosus</i><br>Gmelin, 1791          |   |  |   |   |   | X | X |
| <i>Crisilla beniamina</i><br>(Monterosato, 1884)  | X |  | X |   |   |   |   |
| <i>Cylichna cylindracea</i><br>(Pennant, 1777)    |   |  |   |   |   |   | X |
| <i>Dikoleps nitens</i><br>(Philippi, 1844)        |   |  | X | X |   |   |   |
| <i>Diodora gibberula</i><br>(Lamarck, 1822)       |   |  | X | X |   | X | X |
| <i>Eatonina fulgida</i><br>(J. Adams, 1797)       | X |  | X |   | X |   |   |
| <i>Ecrobia ventrosa</i><br>(Montagu, 1803)        | X |  | X |   |   |   |   |
| <i>Elysia timida</i><br>(Risso, 1818)             |   |  | X | X |   |   |   |
| <i>Enginella leucozona</i><br>(Philippi, 1844)    |   |  |   |   |   |   | X |
| <i>Episcomitra cornicula</i><br>(Linnaeus, 1758)  |   |  |   |   |   |   | X |
| <i>Eulimella cerullii</i><br>(Cossmann, 1915)     |   |  |   |   |   | X | X |
| <i>Euthria cornea</i><br>(Linnaeus, 1758)         |   |  | X | X |   |   |   |
| <i>Fossarus ambiguus</i><br>(Linnaeus, 1758)      |   |  | X |   |   |   |   |
| <i>Fusinus pulchellus</i><br>(Philippi, 1840)     |   |  | X |   |   | X | X |
| <i>Gibberula miliaria</i><br>(Linnaeus, 1758)     |   |  | X | X |   | X | X |
| <i>Gibberula philippii</i><br>(Monterosato, 1878) | X |  | X | X |   | X | X |
| <i>Gibbula</i> sp.                                | X |  | X | X |   | X | X |
| <i>Haliotis tuberculata</i><br>Linnaeus, 1758     |   |  | X | X |   | X | X |
| <i>Haminoea hydatis</i><br>(Linnaeus, 1758)       |   |  |   |   |   |   | X |

|                                                  |   |   |   |   |   |   |
|--------------------------------------------------|---|---|---|---|---|---|
| <i>Hexaplex trunculus</i><br>(Linnaeus, 1758)    |   |   | X | X | X | X |
| <i>Hydrobia acuta neglecta</i> (Muus, 1963)      | X | X | X |   |   |   |
| <i>Jujubinus exasperates</i><br>(Pennant, 1777)  | X |   |   |   |   | X |
| <i>Jujubinus gravinae</i><br>(Dautzenberg, 1881) | X | X | X | X |   |   |
| <i>Jujubinus striatus</i><br>(Linnaeus, 1758)    | X | X | X | X | X | X |
| <i>Luria lurida</i><br>(Linnaeus, 1758)          |   |   |   |   | X |   |
| <i>Mangelia costulata</i> Risso, 1826            |   |   | X | X | X | X |
| <i>Marshallora adversa</i><br>(Montagu, 1803)    |   |   |   |   | X | X |
| <i>Melarhappe neritoides</i><br>(Linnaeus, 1758) |   |   | X | X |   |   |
| <i>Melanella petitiana</i><br>(Brusina, 1869)    | X | X |   |   |   |   |
| <i>Melanella polita</i><br>(Linnaeus, 1758)      |   |   | X |   |   |   |
| <i>Mitrella</i> sp.                              |   | X | X | X | X | X |
| <i>Muricopsis cristata</i> (Brocchi, 1814)       |   |   | X |   | X | X |
| <i>Naria spurca</i><br>(Linnaeus, 1758)          |   |   |   |   | X |   |
| <i>Naticarius hebraeus</i> (Martyn, 1786)        |   |   |   |   | X | X |
| <i>Nodulus contortus</i><br>(Jeffreys, 1856)     | X | X |   |   |   |   |
| Nudibranchia gen. sp.                            | X | X | X | X |   |   |
| <i>Ocenebra edwardsii</i><br>(Payraudeau, 1826)  |   |   | X | X |   |   |
| <i>Ocenebra erinaceus</i><br>(Linnaeus, 1758)    |   |   |   |   | X | X |
| <i>Patella pellucida</i><br>Linnaeus, 1758       |   |   | X | X |   |   |
| <i>Patella rustica</i><br>Linnaeus, 1758         |   |   | X | X |   |   |



|                          |   |   |   |  |   |   |   |
|--------------------------|---|---|---|--|---|---|---|
| <i>Patella</i>           |   |   |   |  |   |   |   |
| <i>ulyssiponensis</i>    |   |   | X |  | X |   |   |
| Gmelin, 1791             |   |   |   |  |   |   |   |
| <i>Phorcus</i> sp. juv.  | X | X | X |  | X |   |   |
| <i>Pisinna glabrata</i>  |   |   |   |  |   |   |   |
| (Megerle von             | X | X |   |  |   |   |   |
| Mühlfeld, 1824)          |   |   |   |  |   |   |   |
| <i>Pusia ebenus</i>      |   |   |   |  |   | X | X |
| (Lamarck, 1811)          |   |   |   |  |   |   |   |
| <i>Pusia tricolor</i>    |   |   | X |  | X | X | X |
| (Gmelin, 1791)           |   |   |   |  |   |   |   |
| <i>Pusillina</i>         |   |   |   |  |   |   |   |
| <i>marginata</i>         | X | X | X |  | X |   |   |
| (Michaud, 1830)          |   |   |   |  |   |   |   |
| <i>Raphitoma</i> sp.     |   |   |   |  |   |   | X |
| <i>Retusa truncatula</i> | X |   |   |  |   |   | X |
| (Bruguière, 1792)        |   |   |   |  |   |   |   |
| <i>Rissoa</i>            |   |   |   |  |   |   |   |
| <i>auriscalpium</i>      |   |   |   |  |   | X | X |
| (Linnaeus, 1758)         |   |   |   |  |   |   |   |
| <i>Rissoa guerinii</i>   |   |   | X |  | X | X | X |
| Récluz, 1843             |   |   |   |  |   |   |   |
| <i>Rissoa italiensis</i> | X | X | X |  | X | X | X |
| (Verduin, 1985)          |   |   |   |  |   |   |   |
| <i>Rissoa lia</i>        |   |   |   |  | X |   |   |
| (Monterosato,            |   |   |   |  |   |   |   |
| 1884)                    |   |   |   |  |   |   |   |
| <i>Rissoa lilacina</i>   | X | X |   |  |   |   |   |
| (Récluz, 1843)           |   |   |   |  |   |   |   |
| <i>Rissoa</i>            |   |   |   |  |   |   |   |
| <i>membranacea</i> (J.   |   |   |   |  | X |   |   |
| Adams, 1800)             |   |   |   |  |   |   |   |
| <i>Rissoa splendida</i>  | X | X |   |  |   |   |   |
| (Eichwald, 1830)         |   |   |   |  |   |   |   |
| <i>Rissoa variabilis</i> | X | X | X |  | X | X | X |
| (Megerle von             |   |   |   |  |   |   |   |
| Mühlfeld, 1824)          |   |   |   |  |   |   |   |
| <i>Rissoa ventricose</i> |   | X |   |  | X |   |   |
| (Desmarest, 1814)        |   |   |   |  |   |   |   |
| <i>Rissoa violacea</i>   | X |   | X |  | X | X | X |
| (Desmarest, 1814)        |   |   |   |  |   |   |   |
| <i>Rissoella inflata</i> | X | X |   |  |   |   |   |
| (Locard, 1892)           |   |   |   |  |   |   |   |
| <i>Scissurella</i>       |   |   |   |  |   |   |   |
| <i>costata</i>           | X | X |   |  | X |   |   |
| (d'Orbigny, 1824)        |   |   |   |  |   |   |   |
| <i>Setia pulcherrima</i> |   |   |   |  | X |   |   |
| (Jeffreys, 1848)         |   |   |   |  |   |   |   |
| <i>Smaragdia viridis</i> |   |   |   |  |   | X | X |
| (Linnaeus, 1758)         |   |   |   |  |   |   |   |
| <i>Stramonita</i>        |   |   |   |  |   |   |   |
| <i>haemastoma</i>        |   |   | X |  | X |   |   |
| (Linnaeus, 1767)         |   |   |   |  |   |   |   |
| <i>Tarantinaea</i>       |   |   |   |  |   |   |   |
| <i>lignaria</i>          |   |   | X |  | X |   |   |
| (Linnaeus, 1758)         |   |   |   |  |   |   |   |

|                                                         |   |   |   |   |   |   |   |
|---------------------------------------------------------|---|---|---|---|---|---|---|
| <i>Thylacodes arenarius</i><br>(Linnaeus, 1758)         |   |   | X |   |   |   |   |
| <i>Tricolia entomochelia</i><br>(Gofas, 1994)           | X | X |   |   |   |   |   |
| <i>Tricolia landinii</i><br>(Bogi & Campani, 2007)      | X | X |   |   |   |   |   |
| <i>Tricolia pullus pullus</i> (Linneo, 1758)            | X | X | X | X | X | X | X |
| <i>Tricolia speciosa</i> (Megerle von Mühlfeld, 1824)   |   |   |   |   |   | X | X |
| <i>Tritia corniculum</i><br>(Olivi, 1792)               |   |   |   | X |   |   | X |
| <i>Tritia incrassata</i><br>(Strøm, 1768)               |   |   | X | X | X | X | X |
| <i>Turbonilla lactea</i><br>(Linnaeus, 1758)            |   |   |   |   | X |   | X |
| <i>Vermetus triquetrus</i> Bivona-Bernardi, 1832        |   |   | X |   |   |   |   |
| <i>Vitreolina philippii</i><br>(Rayneval & Ponzi, 1854) | X | X |   |   |   |   |   |
| <b>Polyplacophora</b>                                   |   |   |   |   |   |   |   |
| <i>Acanthochitona crinita</i> (Pennant, 1777)           |   |   | X | X |   |   |   |
| <i>Leptochiton scabridus</i><br>(Jeffreys, 1880)        | X |   |   |   |   |   |   |
| <i>Lepidochitona cinerea</i><br>(Linnaeus, 1767)        |   |   | X |   |   |   |   |
